# Supplementary material
Source: Springer Nature journal article supplement (https://www.springermedizin.de/resource/supplementary/12931_2010_1054_MOESM5_ESM.pdf/9425532)

Naïve C57Bl/6

Naïve A/J

Balb/C + PLL, o.p.

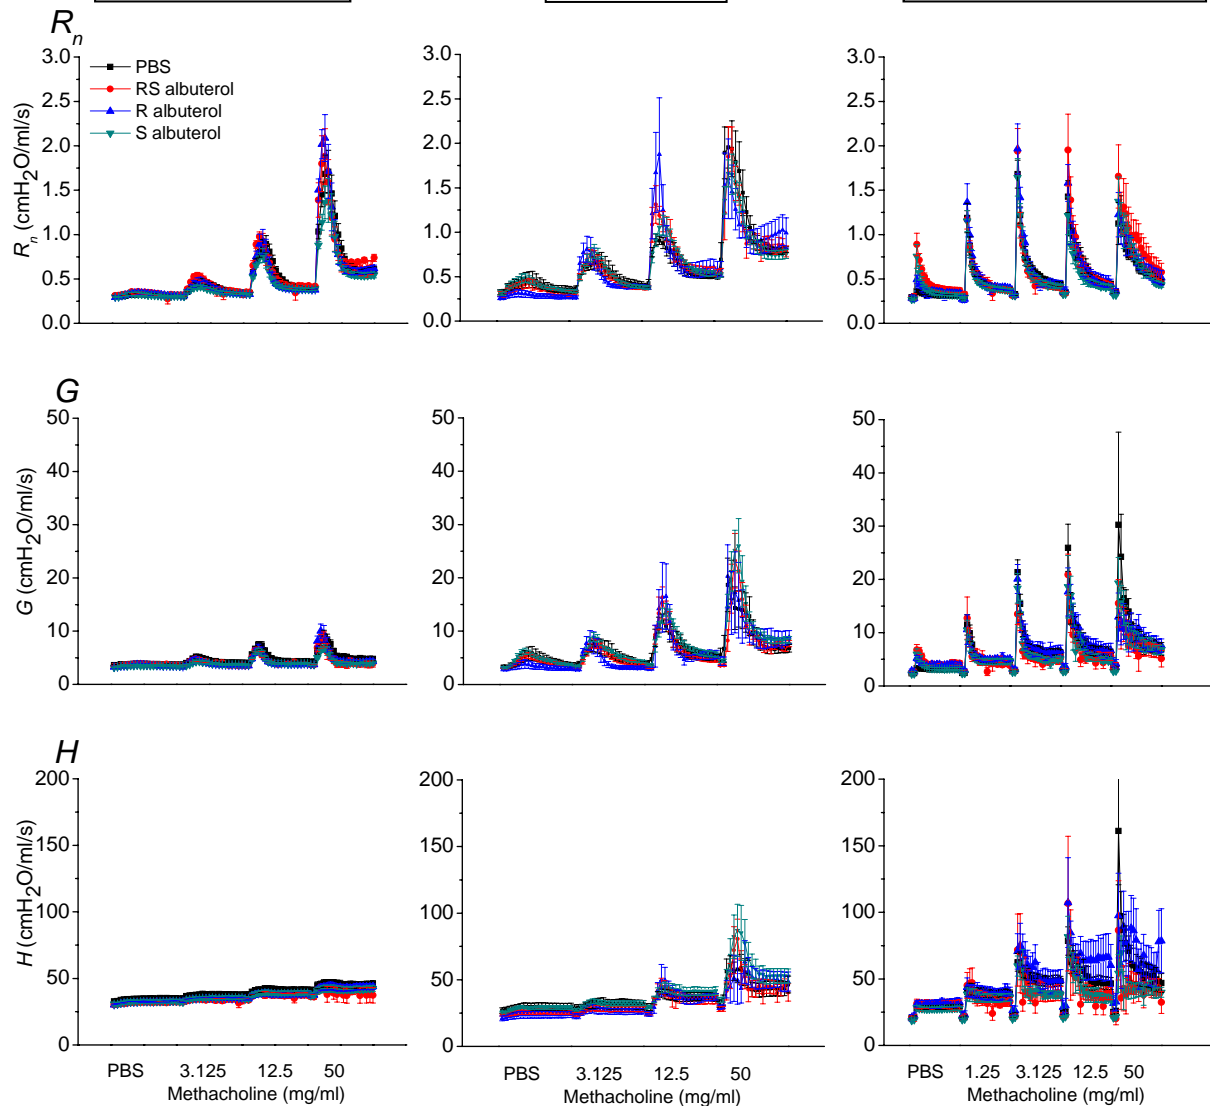

Supplement: MOESM5 [file 9425532]
